# Supplementary material for: Systems-biology analysis of rheumatoid arthritis fibroblast-like synoviocytes implicates cell line-specific transcription factor function
Source: PubMed Central journal article supplement (PMC9584907; doi:10.1038/s41467-022-33785-w), 2022-10-20
Supplement: 41467_2022_33785_MOESM1_ESM.pdf [file 41467_2022_33785_MOESM1_ESM.pdf]

## **Systems-biology analysis of rheumatoid arthritis fibroblast-like synoviocytes reveals cell line-specific transcription factor function**

### **Supplementary Discussion**

#### **E2F7/E2F1 antagonistic CL2 signature**

The transcriptional repressor E2F7 is the rank 3 cluster-specific TF (Fig. 1c) ( $q$ -value =  $7.1 \times 10^{-3}$ ). This prediction is driven by its differential expression (3.89-fold CL2,  $p$ -value =  $4.2 \times 10^{-4}$ ) (a factor in determining PPR via edge weight construction: see Methods) since the other important metric governing PPR, network connectivity, is relatively low for E2F7, as illustrated by its peripheral position and low out-degree in the CL2 TF-TF subnetwork (Fig. 3b). The transcriptional activator E2F1 (2.83-fold CL2,  $p$ -value =  $5.4 \times 10^{-3}$ ), and E2F7 are mutually antagonistic and regulate proliferation, differentiation, apoptosis and responses to DNA-damage.<sup>1</sup> However, we observe that they are both up-regulated in CL2. Paradoxically, some cancers, such as head and neck squamous cell carcinomas (HNSCCs) also exhibit the overexpression of both TFs. Mislocalization of E2F7 from the nucleus to the cytoplasm via XPO1 nuclear export is a feature in 80% of HNSCCs leading to aberrant differentiation, increased proliferation and drug resistance.<sup>2</sup> In our data, we observe a strong correlation between E2F7 and XPO1 transcript levels (Pearson  $R = 0.92$ ) indicating that, despite increased transcription of E2F7 in CL2, there is also increased XPO1 available to potentially export the E2F7 protein from the nucleus. Indeed, known transcriptional targets of E2F7 repression such as Rac GTPase activating protein 1 (RACGAP1) (2.26-fold CL2,  $p$ -value =  $1.4 \times 10^{-2}$ ) and DNA-damage response genes such as RAD51<sup>3</sup> (2.51-fold CL2,  $p$ -value =  $6.8 \times 10^{-3}$ ) are significantly more highly expressed in CL2 despite the approximately 4-fold higher mRNA levels of E2F7 in CL2 compared to CL1. We regard these findings as observational and note that many other mechanisms may also “inactivate” E2F7 transcriptional effects such as post-translational modifications and mutations in the sequence of the E2F7 protein.

### **Supplementary References**

1. Dimova, D. K. & Dyson, N. J. The E2F transcriptional network: old acquaintances with new faces. *Oncogene* **24**, 2810–2826 (2005).
2. Saenz-Ponce, N. *et al.* Targeting the XPO1-dependent nuclear export of E2F7 reverses anthracycline resistance in head and neck squamous cell carcinomas. *Sci. Transl. Med.* **10**, (2018).
3. Mitxelena, J. *et al.* An E2F7-dependent transcriptional program modulates DNA damage repair and genomic stability. *Nucleic Acids Res.* **46**, 4546–4559 (2018).

**Supplementary Figures**

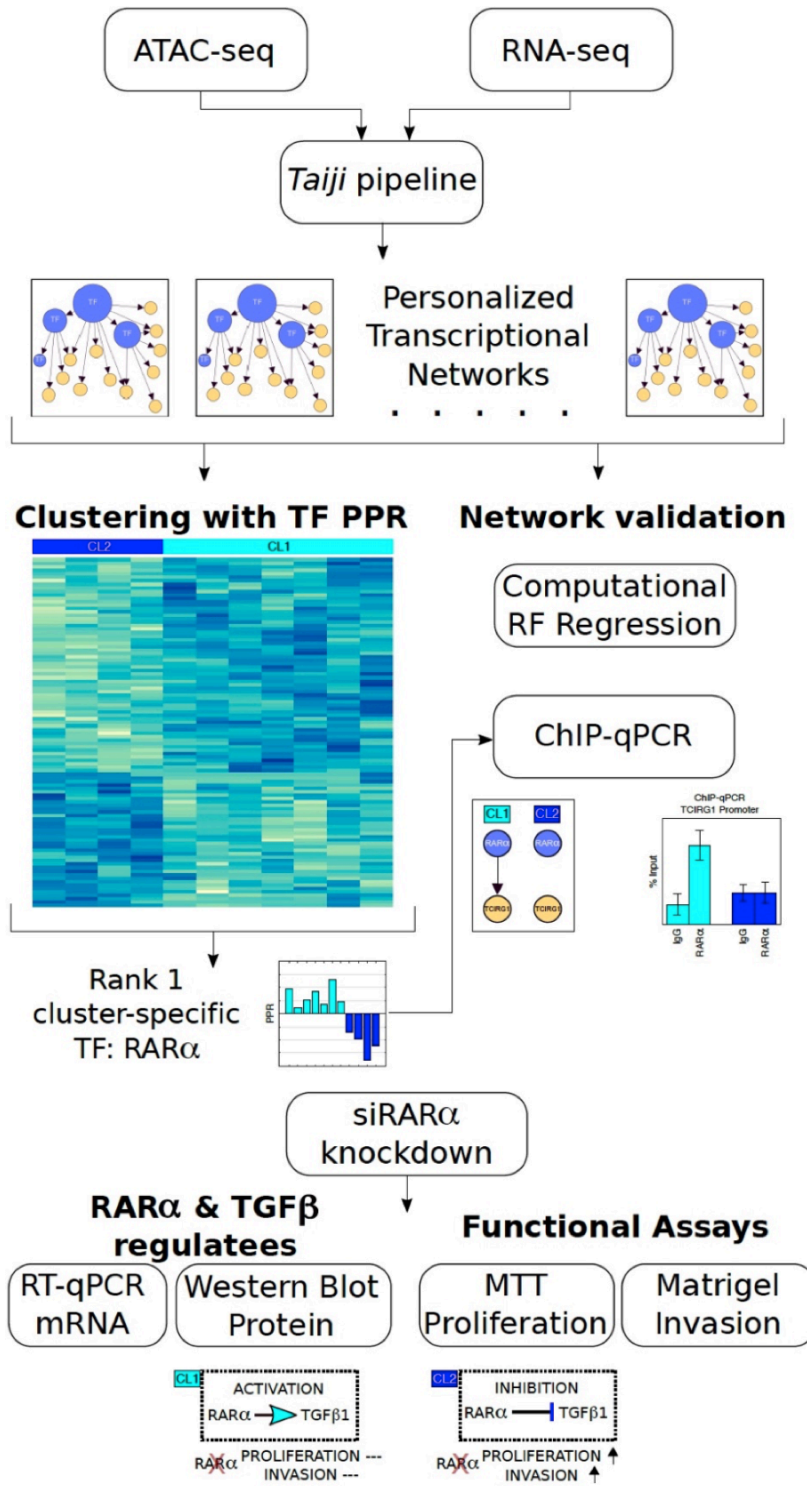

**Supplementary Figure 1**

Computational and experimental pipeline overview.

**TAIJI PIPELINE**  
**PERSONALIZED TRANSCRIPTIONAL GENE REGULATION NETWORKS**

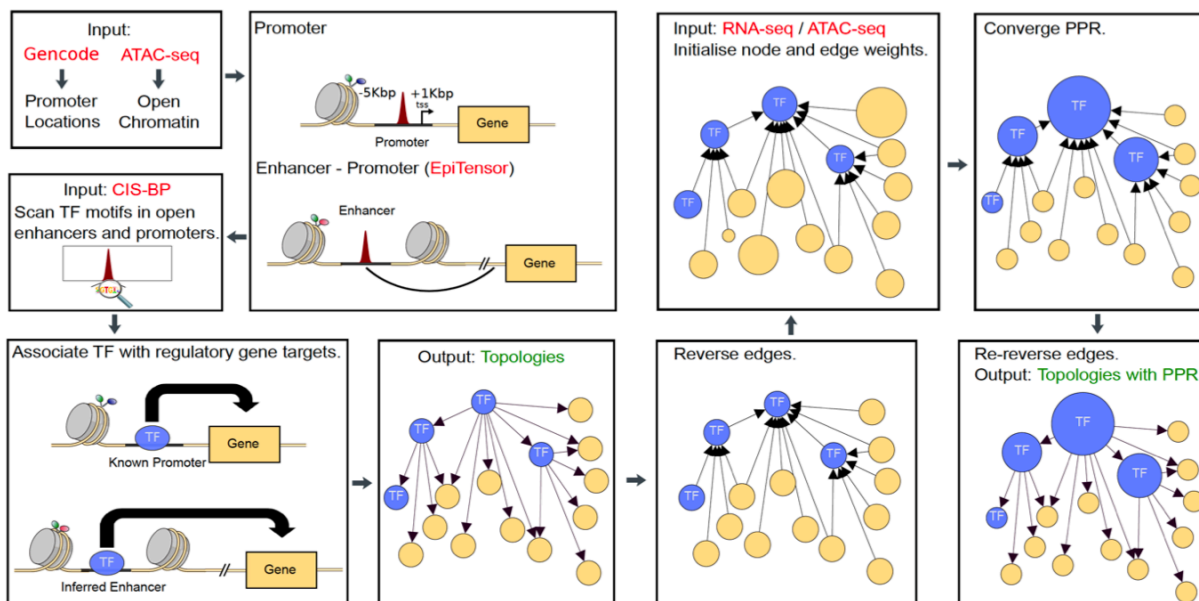

**Supplementary Figure 2**

Extended representation of the Taiji Integrative Pipeline for construction of patient-specific global transcriptional gene regulation networks.

a

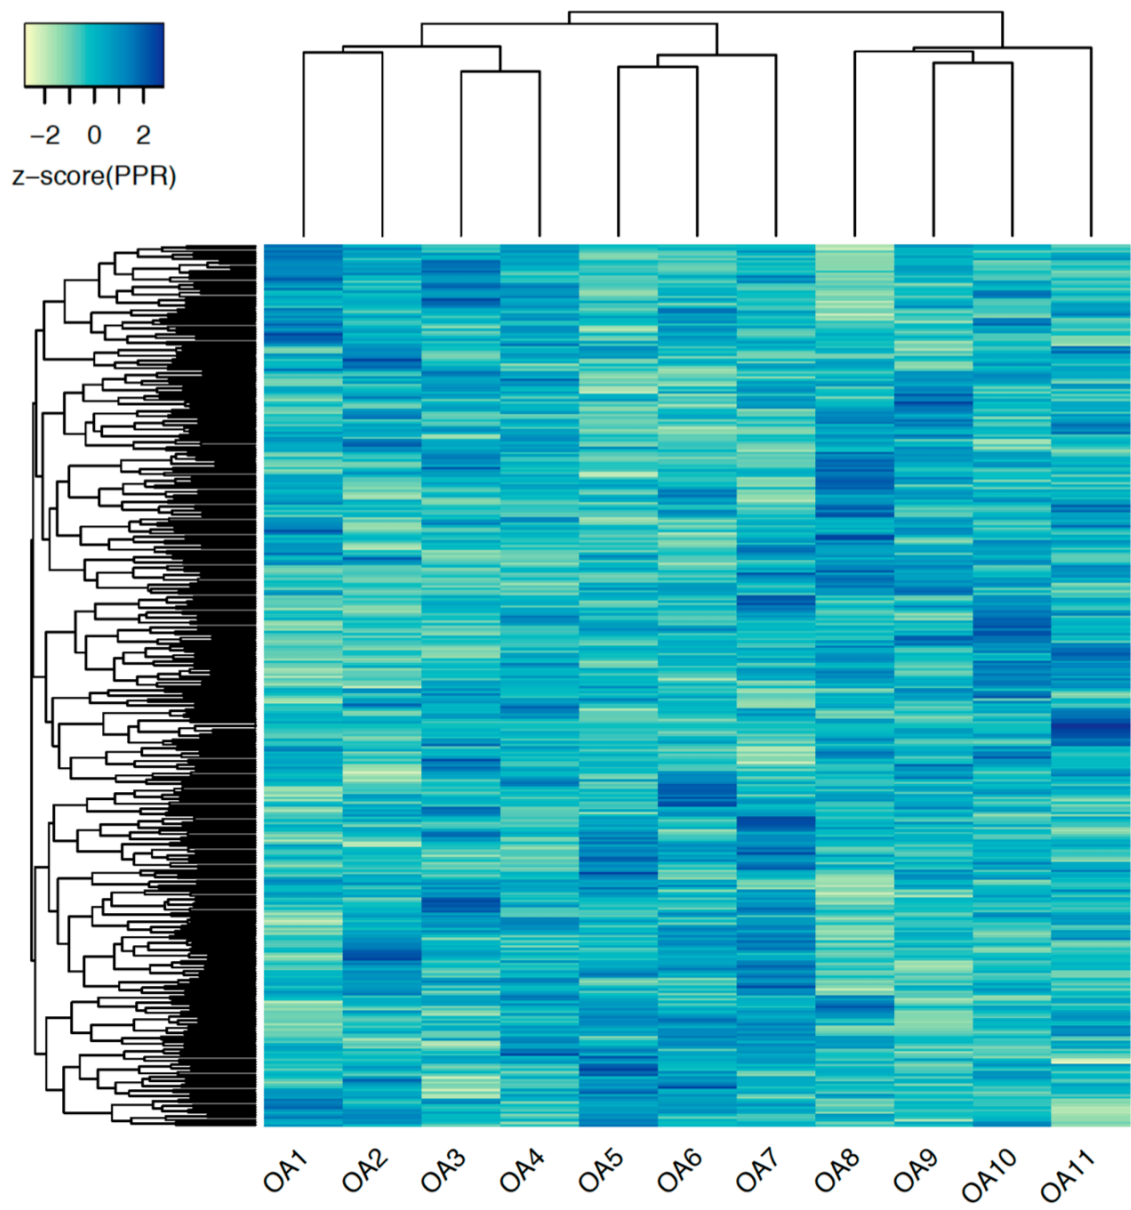

b

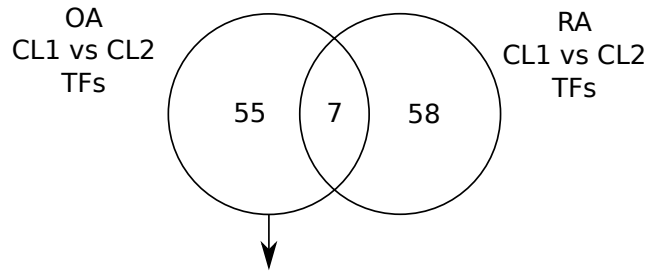

| Pathway name                                                                         | Entities found | Entities Total | Entities ratio | Entities pValue | Entities FDR | Reactions found | Reactions total | Reactions ratio | Species name |
|--------------------------------------------------------------------------------------|----------------|----------------|----------------|-----------------|--------------|-----------------|-----------------|-----------------|--------------|
| Nuclear Receptor transcription pathway                                               | 10             | 86             | 0.006          | 2.43E-10        | 2.69E-8      | 2               | 2               | 0               | Homo sapiens |
| Activation of anterior HOX genes in hindbrain development during early embryogenesis | 11             | 116            | 0.008          | 2.47E-10        | 2.69E-8      | 21              | 43              | 0.003           | Homo sapiens |
| Activation of HOX genes during differentiation                                       | 11             | 116            | 0.008          | 2.47E-10        | 2.69E-8      | 21              | 43              | 0.003           | Homo sapiens |
| Transcriptional regulation of pluripotent stem cells                                 | 7              | 45             | 0.003          | 1.89E-8         | 1.55E-6      | 11              | 35              | 0.003           | Homo sapiens |
| Interleukin-4 and Interleukin-13 signaling                                           | 11             | 211            | 0.015          | 1.1E-7          | 7.12E-6      | 19              | 47              | 0.003           | Homo sapiens |
| Generic Transcription Pathway                                                        | 26             | 1,555          | 0.107          | 2.6E-6          | 1.41E-4      | 71              | 824             | 0.061           | Homo sapiens |
| STAT3 nuclear events downstream of ALK signaling                                     | 4              | 18             | 0.001          | 6.01E-6         | 2.77E-4      | 10              | 10              | 0.001           | Homo sapiens |
| RNA Polymerase II Transcription                                                      | 26             | 1,694          | 0.116          | 1.23E-5         | 5.06E-4      | 71              | 885             | 0.065           | Homo sapiens |
| Nuclear events stimulated by ALK signaling in cancer                                 | 4              | 27             | 0.002          | 3E-5            | 1.05E-3      | 4               | 9               | 0.001           | Homo sapiens |
| PTK6 Expression                                                                      | 3              | 10             | 0.001          | 4E-5            | 1.25E-3      | 3               | 3               | 0               | Homo sapiens |
| Gene expression (Transcription)                                                      | 26             | 1,855          | 0.128          | 6E-5            | 1.73E-3      | 73              | 1,000           | 0.074           | Homo sapiens |
| FOXO-mediated transcription                                                          | 6              | 110            | 0.008          | 7.66E-5         | 2.07E-3      | 13              | 85              | 0.006           | Homo sapiens |
| Regulation of gene expression by Hypoxia-inducible Factor                            | 3              | 15             | 0.001          | 1.29E-4         | 3.22E-3      | 7               | 7               | 0.001           | Homo sapiens |
| Signaling by ALK                                                                     | 4              | 43             | 0.003          | 1.74E-4         | 3.99E-3      | 13              | 40              | 0.003           | Homo sapiens |
| Interferon alpha/beta signaling                                                      | 7              | 186            | 0.013          | 1.9E-4          | 3.99E-3      | 18              | 22              | 0.002           | Homo sapiens |
| Signaling by Interleukins                                                            | 13             | 643            | 0.044          | 2.08E-4         | 4.15E-3      | 102             | 493             | 0.036           | Homo sapiens |
| Signaling by cytosolic FGFR1 fusion mutants                                          | 3              | 23             | 0.002          | 4.47E-4         | 7.27E-3      | 8               | 14              | 0.001           | Homo sapiens |
| FOXO-mediated transcription of cell death genes                                      | 3              | 23             | 0.002          | 4.47E-4         | 7.27E-3      | 5               | 15              | 0.001           | Homo sapiens |
| Cytokine Signaling in Immune system                                                  | 17             | 1,092          | 0.075          | 4.62E-4         | 7.27E-3      | 141             | 708             | 0.052           | Homo sapiens |
| NGF-stimulated transcription                                                         | 4              | 56             | 0.004          | 4.7E-4          | 7.27E-3      | 6               | 37              | 0.003           | Homo sapiens |

### Supplementary Figure 3

(a) Hierarchical clustering of 11 OA cell lines using the top 350 TFs ranked by variance in their PPR leads to two clusters containing 7 OA patients and 4 OA patients, OA clusters 1 (OA CL1) and 2 (OA CL2) respectively, at the first split in the dendrogram. 62 TFs were found to have significantly different ( $p$ -value  $< 0.05$ ) PPR values from a two-tailed Students  $t$ -test between OA CL1 and OA CL2. Only 7 of which were common to the 65 differential TFs between RA CL1 and CL2 illustrating disease specificity. (b) Functional enrichment analysis of the 62 OA cluster-specific TFs results in developmental pathways including: *Activation of HoX genes during differentiation* ( $p$ -value =  $2.47 \times 10^{-10}$  from hypergeometric test).

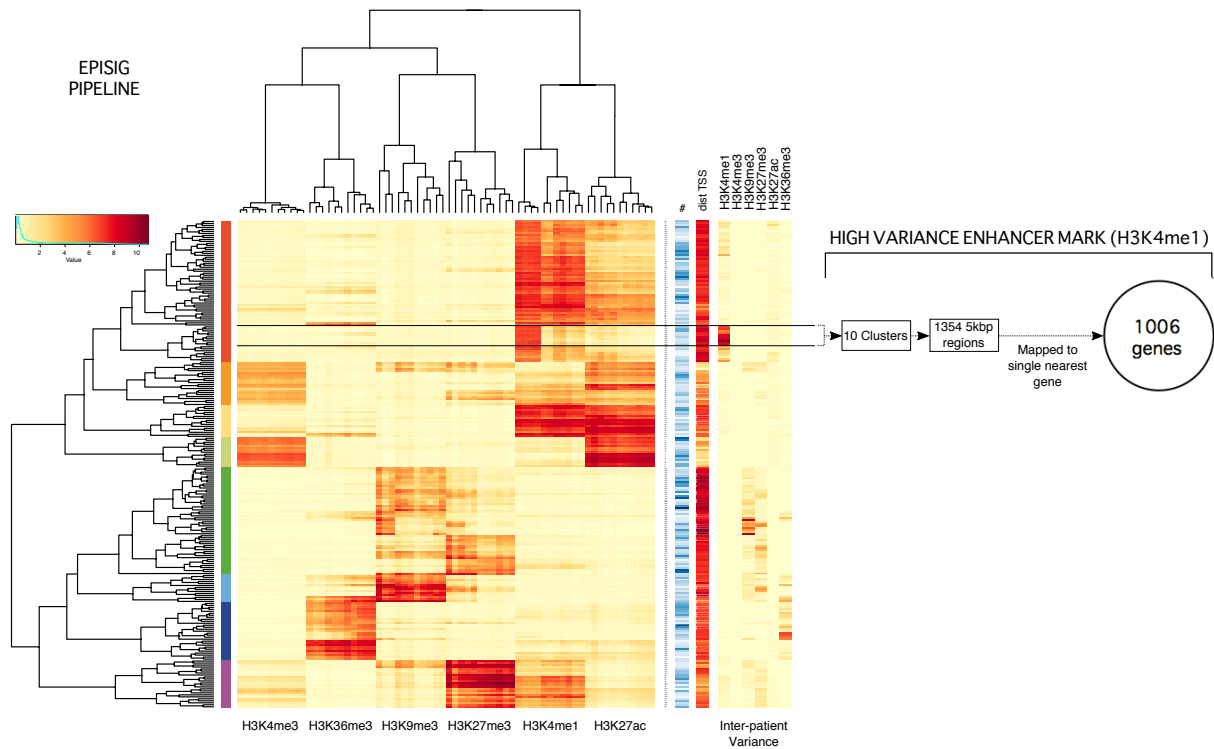

**GO BIOLOGICAL PROCESS**

| Term Name                                            | Binom Rank | Binom Raw p-Value | Binom FDR Q-Val | Binom Fold Enrichment | Binom Observed Region Hits | Binom Region Set Coverage | Hyper Rank | Hyper FDR Q-Val | Hyper Fold Enrichment | Hyper Observed Gene Hits | Hyper Total Genes | Hyper Gene Set Coverage |
|------------------------------------------------------|------------|-------------------|-----------------|-----------------------|----------------------------|---------------------------|------------|-----------------|-----------------------|--------------------------|-------------------|-------------------------|
| heart development                                    | 2          | 4.3370e-14        | 2.8505e-10      | 2.1279                | 118                        | 8.71%                     | 4          | 6.7734e-17      | 3.1654                | 80                       | 466               | 7.95%                   |
| cardiac chamber development                          | 10         | 4.0538e-11        | 5.3287e-8       | 2.7166                | 57                         | 4.21%                     | 22         | 1.6119e-13      | 4.6695                | 39                       | 154               | 3.88%                   |
| cardiac septum development                           | 12         | 9.8450e-11        | 1.0784e-7       | 3.0363                | 46                         | 3.40%                     | 21         | 1.1339e-13      | 5.9541                | 31                       | 96                | 3.08%                   |
| mesenchyme development                               | 15         | 1.9538e-10        | 1.7122e-7       | 2.4014                | 66                         | 4.87%                     | 44         | 6.0437e-10      | 3.6877                | 38                       | 190               | 3.78%                   |
| heart morphogenesis                                  | 16         | 3.3796e-10        | 2.7785e-7       | 2.3504                | 67                         | 4.95%                     | 25         | 1.7495e-12      | 3.7865                | 46                       | 224               | 4.57%                   |
| cardiac septum morphogenesis                         | 17         | 3.8320e-10        | 2.9630e-7       | 3.3179                | 38                         | 2.81%                     | 24         | 7.5621e-13      | 7.0917                | 25                       | 65                | 2.49%                   |
| cardiac chamber morphogenesis                        | 20         | 5.9494e-10        | 3.9102e-7       | 2.7906                | 48                         | 3.55%                     | 28         | 1.2589e-11      | 4.9169                | 32                       | 120               | 3.18%                   |
| mesenchymal cell differentiation                     | 24         | 8.8620e-10        | 4.8538e-7       | 2.6274                | 52                         | 3.84%                     | 80         | 4.4421e-8       | 3.9713                | 28                       | 130               | 2.78%                   |
| regulation of organ morphogenesis                    | 29         | 1.6859e-9         | 7.6417e-7       | 2.3259                | 63                         | 4.65%                     | 90         | 9.1175e-8       | 2.9620                | 40                       | 249               | 3.98%                   |
| regulation of canonical Wnt signaling pathway        | 33         | 5.7069e-9         | 2.2732e-6       | 2.4323                | 54                         | 3.99%                     | 185        | 2.1782e-5       | 2.6013                | 34                       | 241               | 3.38%                   |
| palate development                                   | 35         | 6.9612e-9         | 2.6144e-6       | 2.9748                | 38                         | 2.81%                     | 159        | 6.6662e-6       | 4.0083                | 20                       | 92                | 1.99%                   |
| extracellular matrix organization                    | 36         | 7.0944e-9         | 2.5868e-6       | 2.3293                | 58                         | 4.28%                     | 222        | 8.3209e-5       | 2.3048                | 38                       | 304               | 3.78%                   |
| extracellular structure organization                 | 37         | 7.4443e-9         | 2.6447e-6       | 2.3260                | 58                         | 4.28%                     | 226        | 8.8615e-5       | 2.2972                | 38                       | 305               | 3.78%                   |
| regulation of epithelial cell proliferation          | 39         | 9.3714e-9         | 3.1586e-6       | 2.1156                | 70                         | 5.17%                     | 78         | 2.8893e-8       | 2.8611                | 45                       | 290               | 4.47%                   |
| outflow tract morphogenesis                          | 47         | 2.6420e-8         | 7.3891e-6       | 2.9774                | 35                         | 2.58%                     | 49         | 1.1234e-9       | 5.9654                | 22                       | 68                | 2.19%                   |
| regulation of Wnt signaling pathway                  | 48         | 3.2416e-8         | 8.8773e-6       | 2.1001                | 66                         | 4.87%                     | 196        | 3.9189e-5       | 2.3266                | 40                       | 317               | 3.98%                   |
| regulation of morphogenesis of an epithelium         | 49         | 5.6607e-8         | 1.5186e-5       | 2.4864                | 45                         | 3.32%                     | 188        | 2.5121e-5       | 2.9004                | 28                       | 178               | 2.78%                   |
| regulation of epithelial cell migration              | 51         | 5.9997e-8         | 1.5464e-5       | 2.3027                | 52                         | 3.84%                     | 71         | 1.2207e-8       | 3.5073                | 35                       | 184               | 3.48%                   |
| positive regulation of epithelial cell proliferation | 67         | 1.7891e-7         | 3.4709e-5       | 2.4135                | 44                         | 3.25%                     | 208        | 5.6937e-5       | 2.9054                | 26                       | 165               | 2.58%                   |
| positive regulation of epithelial cell migration     | 68         | 1.8415e-7         | 3.5597e-5       | 2.6110                | 38                         | 2.81%                     | 115        | 1.1241e-6       | 3.8480                | 24                       | 115               | 2.39%                   |

ABI3BP ADAMTS20 ADAMTS5  
CCDC80 COL11A1 COL1A2  
COL3A1 COL5A2 COL8A1  
DCN DPT FBLN5 FBN1 FLRT2  
HAS2 ITGA1 ITGA4 ITGB1  
ITGB6 LAMA2 LAMA3 LAMA4  
LAMC1 MATN1 MMP16  
P4HA1 POSTN RECK SFRP2  
SOX9 SPOCK2 TGFB2 THBS1  
TLL1 TNC TNFRSF11B  
VCAM1 VCAN

BMP4 BMP5 CDH13 CDK6 DLG1  
DLX6 DUSP10 FBXW7 FGF7  
FRS2 HAS2 HMGB2 HTR2B  
IFT57 IGF1 IL6 KLF9 LAMC1  
MEF2C MTSS1 NFIB NOG  
NR2F2 NRP1 NRP2 PRKCA  
PRKD1 PTN PTPRM RGCC  
ROBO1 RTN4 SFRP2 SNAI2  
SOX2 SOX9 TACR1 TGFB2  
THBS1 TNFAIP3 TP63 TWIST1  
VEGFC WNT2 WNT5A

**GO MOLECULAR FUNCTION**

| Term Name                         | Binom Rank | Binom Raw p-Value | Binom FDR Q-Val | Binom Fold Enrichment | Binom Observed Region Hits | Binom Region Set Coverage | Hyper Rank | Hyper FDR Q-Val | Hyper Fold Enrichment | Hyper Observed Gene Hits | Hyper Total Genes | Hyper Gene Set Coverage |
|-----------------------------------|------------|-------------------|-----------------|-----------------------|----------------------------|---------------------------|------------|-----------------|-----------------------|--------------------------|-------------------|-------------------------|
| SMAD binding                      | 3          | 1.7895e-8         | 2.5186e-5       | 3.3761                | 30                         | 2.22%                     | 7          | 5.0301e-3       | 3.7375                | 15                       | 74                | 1.49%                   |
| bHLH transcription factor binding | 13         | 9.3727e-5         | 3.0418e-2       | 3.6240                | 13                         | 0.96%                     | 15         | 3.1639e-2       | 5.0864                | 8                        | 29                | 0.80%                   |
| E-box binding                     | 15         | 1.1757e-4         | 3.3070e-2       | 3.3448                | 14                         | 1.03%                     | 17         | 3.8089e-2       | 4.3670                | 9                        | 38                | 0.89%                   |

ACVR1 AXIN2 BMPR1B  
COL1A2 COL3A1 COL5A2  
DAB2 DROSHA HMG2A2  
RGCC SMAD7 TCF12  
TGFB2 ZEB2

**Supplementary Figure 4**

Heatmap hierarchically clustering 245 EpiSig co-modified clusters derived from 78,598 signal-enriched 5kbp regions based on Histone ChIP-seq data for six core histone modifications

(H3K4me1, H3K4me3, H3K9me3, H3K27ac, H3K27me3 and H3K36me3). Each column represents a single RA patient FLS cell line for a specific mark. Rows cluster into putative regulatory regions (e.g. pale green is active promoter marked by H3K4me3 and H3K27ac). Columns cluster by mark. Reading left to right, main heatmap is followed by columns: cluster id, number of 5kbp regions, distance to TSS and inter-patient variance for each mark. 10 high variance enhancer clusters marked, which map to 1,006 genes. Tables for the top significantly enriched (using Mann-Whitney test) GO Biological Process' and GO Molecular Function categories for the 1,006 genes.



a.

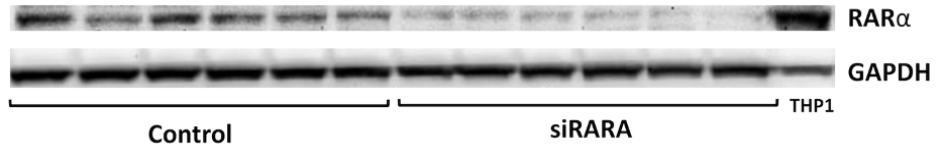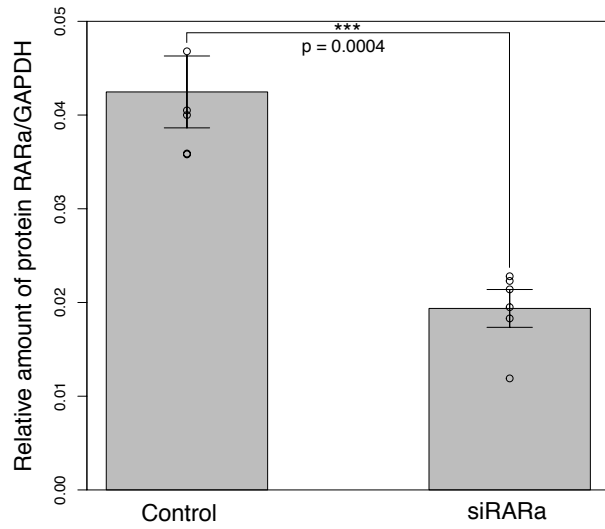

b.

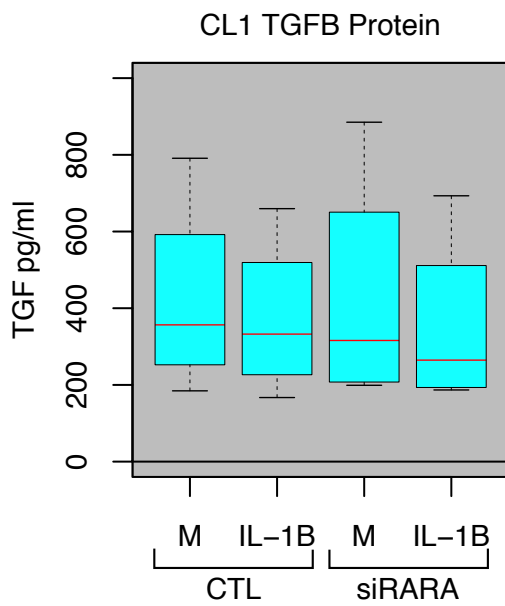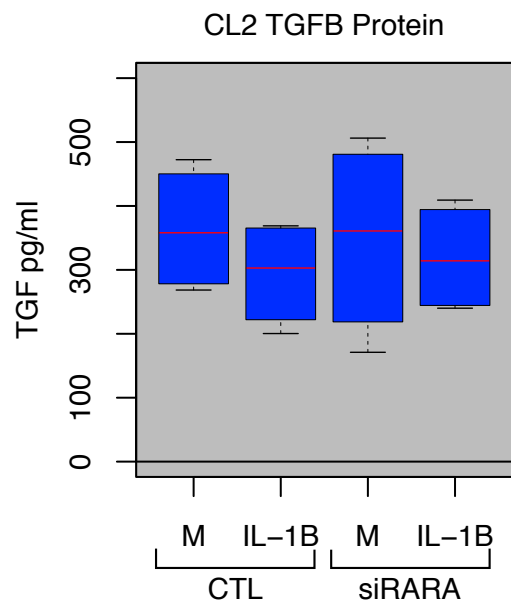

c.

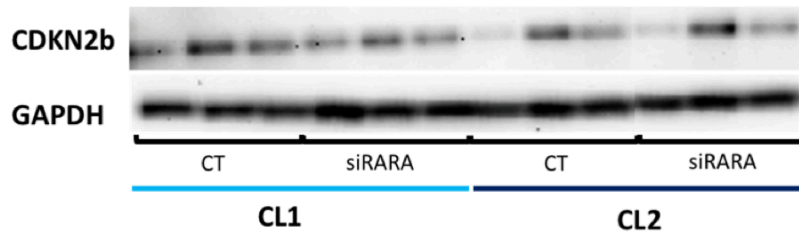

d.

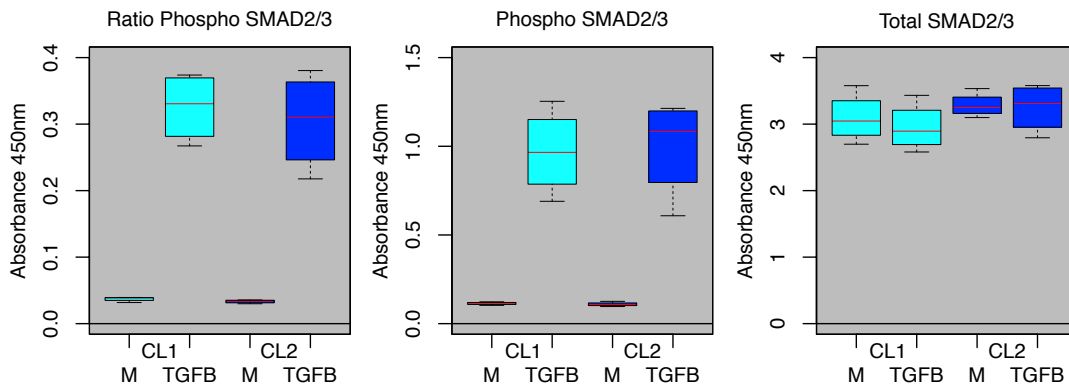

### Supplementary Figure 5

a. Western blot analysis of RAR $\alpha$  knockdown efficiency in RA-FLS lines. 6 biologically independent RA-FLS cell lines were transfected with 1 $\mu$ g of RAR $\alpha$  siRNA (Human RAR $\alpha$  siRNA smartpool, Dharmacon) and control (Non-targeting Control Pool, Dharmacon) and plated for 3 days. The RAR $\alpha$  protein expression was analyzed by Western blot, using 1:1000 dilution of RAR $\alpha$  mouse antibody (Santa Cruz) and normalized to GAPDH (Cell Signaling). The protein level indicates 53% to 58% of RAR $\alpha$  inhibition ( $p=0.004$ ). Barplot centre line is mean and error bars  $\pm 0.5$  s.d. Band intensities were quantified using Versadoc Quantity One 4.6.6, and the statistical significance was determined by two-tailed paired Student's t-test.

b. TGF $\beta$  protein levels by Elisa in 1%FCS/DMEM and then treated with IL-1 (2ng/ml) for CL1 and CL2 lines with (siRARA) and without (CTL) RARA knockdown. CL1  $n=4$  and CL2  $n=4$

biologically independent cell lines. Red centre line for median, whiskers represent maximum and minimum values, box width from quartile 1 to quartile 3.

c. CDKN2B western blot performed once for CL1 and CL2 (CL1 n=3 and CL2 n=3 biologically independent cell lines) treated with IL1 IL-1 (2ng/ml) with (siRARA) and without (CTL) RARA knockdown.

d. Phospho SMAD2/3 by Elisa with and without TGFB treatment for CL1 and CL2 lines. CL1 n=4 and CL2 n=4 biologically independent cell lines. Red centre line for median, whiskers represent maximum and minimum values, box width from quartile 1 to quartile 3.

Source data are provided as a Source Data file.

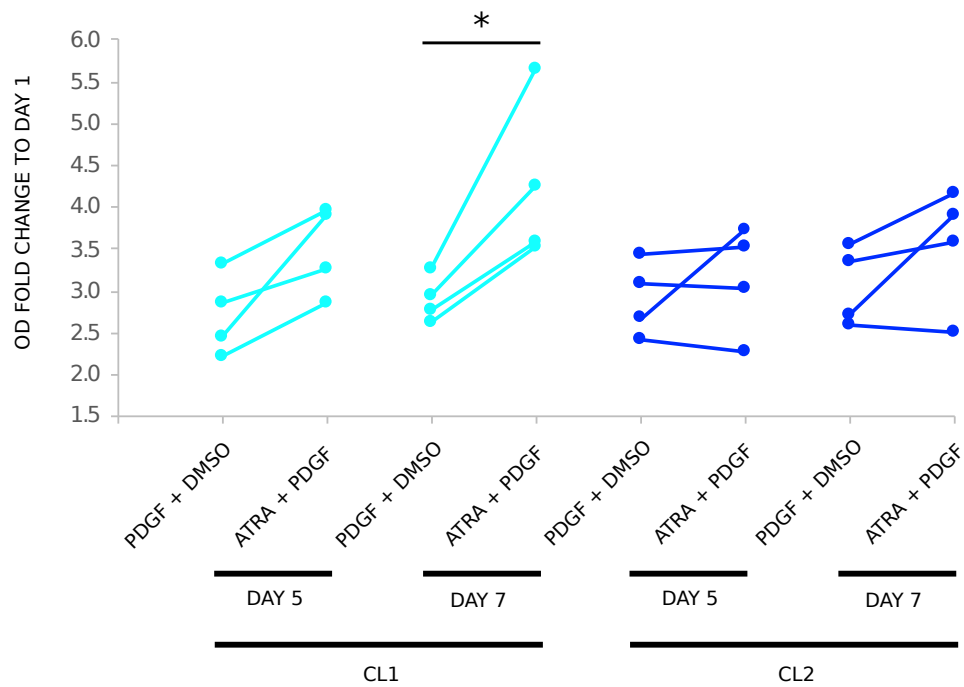

### Supplementary Figure 6

The RARA ligand ATRA has differential effects on CL1 and CL2 FLS growth. CL1 at Day 7 exhibited increase in proliferation under ATRA ( $p=0.0315$  by two-tailed paired Student's t-test). FLS were cultured with 1  $\mu\text{M}$  of ATRA in either medium or 10 ng/ml of PDGF. Cell growth was quantified using an MTT assay. \*:  $p < 0.05$

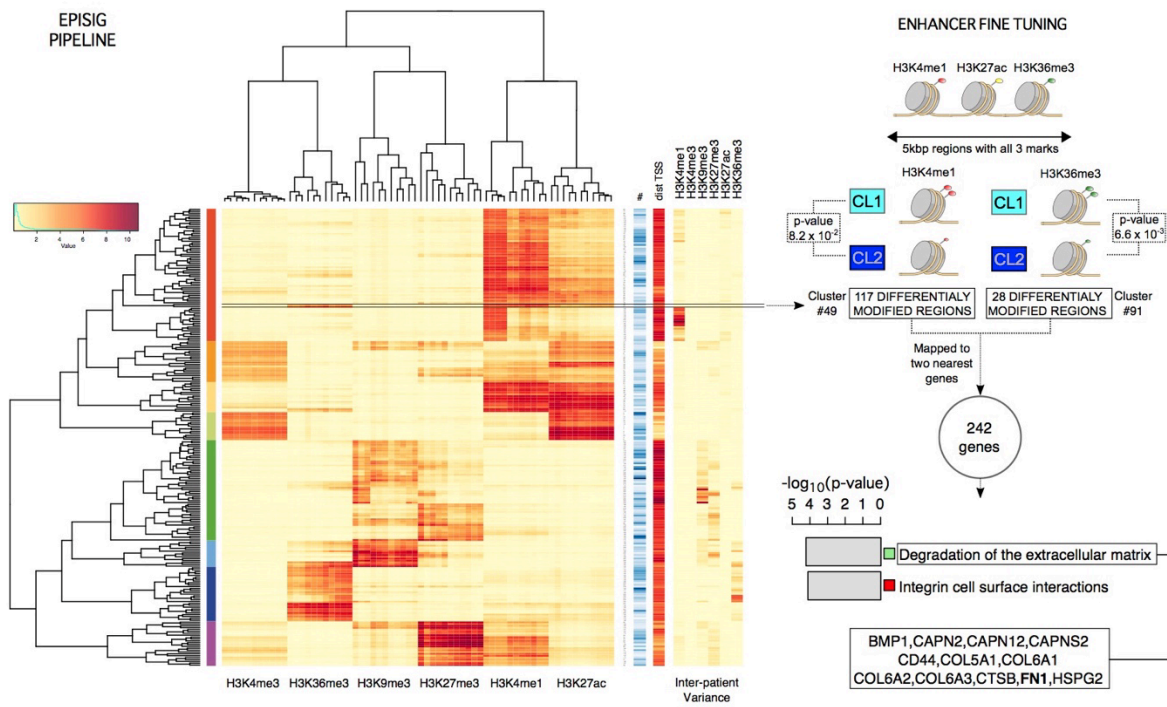

## Supplementary Figure 7

Heatmap as per Figure S4 legend. 2 enhancer clusters with significant CL1 vs CL2 difference in EpiSig signal marked, which map to 242 genes. Functional enrichment analysis of the 242 genes.

## Supplementary Tables

| Taiji prediction                                                          | Experimental validation                                                                                                                                 |
|---------------------------------------------------------------------------|---------------------------------------------------------------------------------------------------------------------------------------------------------|
| <b>Molecular events</b>                                                   |                                                                                                                                                         |
| RARa binding CL1 > CL2 at RARa binding motif                              | Confirmed with ChIP PCR at TCIRG1 promoter                                                                                                              |
| RARa deficiency: differential effect on CL1 and CL2 TGFβ mRNA levels      | Confirmed for TGFβ by RT-qPCR                                                                                                                           |
| RARa deficiency: differential effect on CL1 and CL2 TGFβ regulatees       | Confirmed for CDK2NB, ROCK1, CCND1 expression by RT-qPCR.                                                                                               |
| RARa deficiency: differential effect on CL1 and CL2 TGFβ regulatees       | Confirmed for CDK2NB protein by Western Blot                                                                                                            |
| Normal TGFβ signaling in CL1 and CL2                                      | Confirmed using P-SMAD assay after stimulating cells with TGFβ. Showed that explanation for decreased TGFβ regulatee was not due to deficient signaling |
| RARa deficiency: differential effects on EMT markers in CL1 and CL2       | Confirmed based on FN1 and VIM expression by RT-qPCR                                                                                                    |
| <b>FLS functions</b>                                                      |                                                                                                                                                         |
| RARa deficiency: differential effect on cell invasion in CL1 and CL2      | Confirmed in Matrigel assay                                                                                                                             |
| RARa deficiency: differential effect on cell proliferation in CL1 and CL2 | Confirmed by MTT assay                                                                                                                                  |
| CL1 and CL2 cells phenotypically different.                               | Confirmed by cell size analysis using flow cytometry and image analysis (data not shown)                                                                |
| Proliferation of CL1 < CL2                                                | Confirmed by cell counting in culture                                                                                                                   |
| RARa agonist (ATRA): differential effects on CL1 and CL2 proliferation    | Confirmed by MTT assay                                                                                                                                  |

### Supplementary Table 1

Summary of computational predictions and experimental validation.

| Marker                       | %    | stdev |
|------------------------------|------|-------|
| CD34+                        | 2.0  | 0.8   |
| CD90+                        | 95.9 | 2.4   |
| FAP $\alpha$ +               | 90.5 | 4.9   |
| CD14+                        | 2.0  | 1.1   |
| PDPN+                        | 92.0 | 2.3   |
| CD90+, FAP $\alpha$ +, PDPN+ | 82.5 | 6.7   |
| CD90+, CD14+, PDPN-          | 1.8  | 1.0   |

### Supplementary Table 2

Flow data on FLS phenotype.
