# Supplementary material for: Systems-biology analysis of rheumatoid arthritis fibroblast-like synoviocytes implicates cell line-specific transcription factor function
Source: PubMed Central journal article supplement (PMC9584907; doi:10.1038/s41467-022-33785-w), 2022-10-20
Supplement: 41467_2022_33785_MOESM2_ESM.pdf [file 41467_2022_33785_MOESM2_ESM.pdf]

Supplementary Data 1: Top 100 cluster-specific transcription factors.

Supplementary Data 2: CL1 vs CL2 differentially expressed genes.

Supplementary Data 3: Enriched pathways for CL1 vs CL2 differentially expressed genes.
